# Supplementary material for: Is having a family member with chronic health concerns bad for young people's health? Cross-sectional evidence from a national survey of young Australians
Source: PubMed Central journal article supplement — BMJ Open. 2017 Jan 6;7(1):e013946. doi: 10.1136/bmjopen-2016-013946 (PMC5223635; doi:10.1136/bmjopen-2016-013946), 2017-01-06
Supplement: bmjopen-2016-013946supp.pdf [file bmjopen-2016-013946supp.pdf]

## Supplementary file- Plausible values calculations

Plausible values are values that are imputed to resemble individual responses and have approximately the same distribution as the construct being measured. Their value is dependent on the observed values of the recorded responses and related variables. For information regarding plausible value calculations in the context of the ACWP, please see the technical report [1].

The table below highlights plausible value calculations for Table One where the family cohesion variable was used. Only calculations for the younger year levels appear to alter the results in that the gradient increases across family cohesion levels.

Table 1. Plausible values calculations of prevalence of FHCs in years 4&6, by type and family cohesion level (%)

| Family cohesion level   | Disability               | Mental Illness           | Drugs                    | FHC Overall              |
|-------------------------|--------------------------|--------------------------|--------------------------|--------------------------|
| <b>Years 4&amp;6</b>    |                          |                          |                          |                          |
| Low family cohesion     | 19.7 (8.47-30.98)        | 12.1 (6.29-17.91)        | 10.8 (4.86-16.65)        | 31.5 (19.92-43.06)       |
| Average family cohesion | 13.6 (8.84-18.30)        | 7.6 (4.67-10.53)         | 6.5 (3.52-9.58)          | 22.3 (16.81-27.85)       |
| High family cohesion    | 11.7 (4.91-18.54)        | 9.6 (-0.52-19.75)        | 8.3 (0.47-16.12)         | 23.9 (10.39-37.4)        |
| <b>Year 8</b>           |                          |                          |                          |                          |
| Low family cohesion     | 17.21<br>[12.36 - 22.06] | 20.78<br>[14.18 - 27.37] | 15.49<br>[10.01 - 20.97] | 37.03<br>[28.75 - 45.3]  |
| Average family cohesion | 12.80<br>[10.92 - 14.67] | 10.80<br>[8.6 - 13]      | 7.13<br>[5.44 - 8.82]    | 24.16<br>[21.09 - 27.23] |
| High family cohesion    | 14.19<br>[8.47 - 19.92]  | 6.06<br>[3.22 - 8.9]     | 3.41<br>[-0.01 - 6.83]   | 19.60<br>[13.22 - 25.97] |

Table 2. Plausible values calculations of symptom load by FHC and family cohesion.

|                         | Years 4 & 6           |                       | Year 8                |                       |
|-------------------------|-----------------------|-----------------------|-----------------------|-----------------------|
|                         | No FHC                | FHC                   | No FHC                | FHC                   |
| Low family cohesion     | 35.66 [23.94 - 47.38] | 57.78 [37.24 - 78.32] | 38.55 [29.67 - 47.43] | 55.51 [43.64 - 67.38] |
| Average family cohesion | 28.90 [24.13 - 33.68] | 46.41 [34.28 - 58.54] | 23.95 [20.44 - 27.46] | 39.61 [33.48 - 45.74] |
| High family cohesion    | 20.59 [11.52 - 29.66] | 35.71 [13.83 - 57.6]  | 17.06 [11.09 - 23.03] | 29.55 [13.49 - 45.62] |

Table 3. Plausible values calculations for odds ratios for marginalised and non-marginalised students in Years 4 and 6 and Year 8 experiencing 2+ health complaints at least weekly, controlling for presence of FHC.

| Variables                            | Model 1    |             | Model 2    |             | Model 3    |             | Model 4    |             | Model 5    |             | Any FHC |
|--------------------------------------|------------|-------------|------------|-------------|------------|-------------|------------|-------------|------------|-------------|---------|
|                                      | Odds ratio | 95% CI      |         |
| Year 8                               | 0.82***    | 0.71 - 0.95 | 0.80***    | 0.68 - 0.93 | 0.79***    | 0.67 - 0.92 | 0.84**     | 0.72 - 0.98 | 0.81**     | 0.68 - 0.96 |         |
| Girl                                 | 1.53***    | 1.33 - 1.75 | 1.49***    | 1.29 - 1.72 | 1.37***    | 1.18 - 1.59 | 1.50***    | 1.29 - 1.74 | 1.37***    | 1.17 - 1.61 |         |
| Disability                           | 3.37***    | 2.73 - 4.21 | 3.26***    | 2.57 - 4.13 | 3.03***    | 2.31 - 3.96 | 3.29***    | 2.62 - 4.13 | 2.99***    | 2.22 - 4.02 |         |
| Materially<br>Disadvantaged          | 1.23*      | 0.98 - 1.55 | 1.27**     | 1.00 - 1.6  | 1.15       | 0.90 - 1.48 | 1.17       | 0.92 - 1.50 | 1.15       | 0.87 - 1.51 |         |
| Indigenous                           | 1.10       | 0.79 - 1.52 | 1.13       | 0.78 - 1.64 | 1.19       | 0.83 - 1.72 | 1.16       | 0.81 - 1.66 | 1.30       | 0.85 - 2.01 |         |
| Low family<br>cohesion               | 1.82***    | 1.49 - 2.23 | 1.86***    | 1.50 - 2.31 | 1.66***    | 1.34 - 2.06 | 1.78***    | 1.43 - 2.22 | 1.70***    | 1.34 - 2.16 |         |
| High family<br>cohesion              | 0.64***    | 0.50 - 0.81 | 0.64***    | 0.50 - 0.83 | 0.67***    | 0.52 - 0.86 | 0.66***    | 0.52 - 0.84 | 0.68***    | 0.51 - 0.91 |         |
| FHC                                  |            |             | 1.33       | 0.86 - 2.08 | 1.65*      | 0.91 - 2.97 | 2.67***    | 1.40 - 5.10 | 1.80***    | 1.26 - 2.57 |         |
| Year 8 xFHC                          |            |             | 1.19       | 0.79 - 1.79 | 1.11       | 0.65 - 1.88 | 0.72       | 0.39 - 1.30 | 0.94       | 0.67 - 1.32 |         |
| Girl x FHC                           |            |             | 1.161      | 0.77 - 1.74 | 1.59*      | 0.99 - 2.56 | 1.07       | 0.62 - 1.84 | 1.30*      | 0.97 - 1.75 |         |
| With disability<br>x FHC             |            |             | 0.97       | 0.59 - 1.57 | 1.10       | 0.58 - 2.10 | 1.00       | 0.51 - 1.95 | 1.00       | 0.62 - 1.61 |         |
| Materially<br>disadvantaged<br>x FHC |            |             | 0.76       | 0.42 - 1.37 | 0.99       | 0.53 - 1.84 | 0.97       | 0.51 - 1.85 | 0.97       | 0.60 - 1.55 |         |
| Indigenous x<br>FHC                  |            |             | 0.79       | 0.32 - 1.95 | 0.48       | 0.19 - 1.26 | 0.51       | 0.22 - 1.19 | 0.54*      | 0.27 - 1.11 |         |
| Low family<br>cohesion<br>xFHC       |            |             | 0.85       | 0.48 - 1.51 | 1.36       | 0.71 - 2.59 | 0.93       | 0.48 - 1.79 | 1.08       | 0.68 - 1.72 |         |
| High family<br>cohesion x<br>FHC     |            |             | 0.95       | 0.50 - 1.82 | 0.80       | 0.34 - 1.89 | 0.66       | 0.24 - 1.86 | 0.83       | 0.46 - 1.48 |         |
| Constant                             | 0.34***    | 0.29 - 0.40 | 0.33***    | 0.28 - 0.39 | 0.34***    | 0.29 - 0.41 | 0.32***    | 0.27 - 0.38 | 0.31***    | 0.26 - 0.38 |         |
| Observations                         | 5,220      |             | 5,220      |             | 5,220      |             | 5,220      |             | 5,220      |             |         |

Computed using plausible values calculations. Logistic regression model: two or more health symptoms at least weekly =  $f(\text{girl, marginalised [with disability, materially disadvantaged, Indigenous], family cohesion and FHC, and interaction of Girl, marginalised and family cohesion with FHC}$ . Separate models run for each disability type. Base case: Boy, not marginalised, no FHCs, average family cohesion. \*\*\* $p < .01$ , \*\* $p < .05$ , \* $p < .1$ . McFadden's pseudo-  $R^2$  is calculated as  $1 - [\text{Log Likelihood (full model)} / \text{Log Likelihood (intercept only)}]$ . Low family cohesion represents a score of 0-4 (from 9), high family cohesion represents a score of 8-9 (from 9).

## References

- 1 Lietz P, O'Grady E, Tobin M, et al. Australian Child Wellbeing Project Technical Report. Adelaide, South Australia, 2015.
